# Supplementary material for: Mapping the substrate sequence and length of the Plasmodium M1 and M17 aminopeptidases
Source: bioRxiv or medRxiv preprint supplement (doi:10.1101/2020.10.13.338178), 2020-10-13
Supplement: Supplementary file [file media-1.pdf]

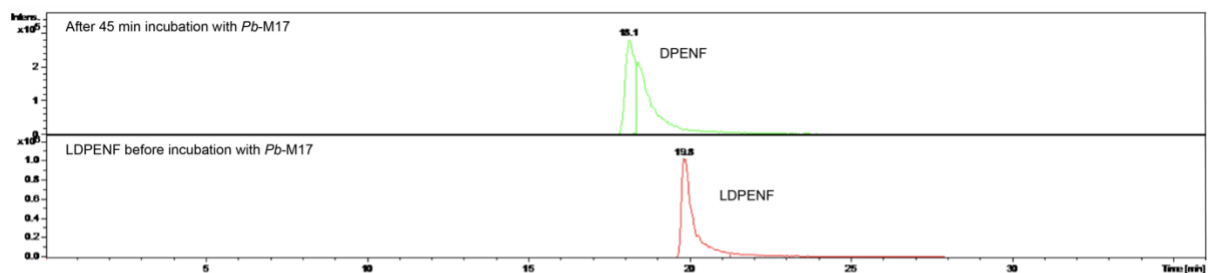

Spectrum for peak observed in green trace, after incubation with *Pb-M17*

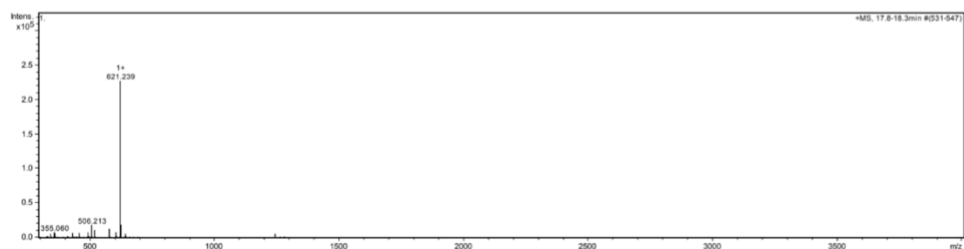

**Supplementary Figure S1. Representative mass spectrometry trace of LDPENF digestion by *Pb-M17*.** After 45 mins of incubation, only one product at a molecular weight of 621 Da is observed. This correlated to the removal of single peptide Leu from the N-terminal of hexapeptide LDPENF, producing pentapeptide DPENF. Trace is representative of cleavage results obtained for each aminopeptidase – in each experiment only peptides of molecular weights 734 Da (LDPENF) and 621 Da (DPENF) were observed.
