# Supplementary material for: Mapping the substrate sequence and length of the Plasmodium M1 and M17 aminopeptidases
Source: bioRxiv or medRxiv preprint supplement (doi:10.1101/2020.10.13.338178), 2020-10-13
Supplement: Supplementary file [file media-3.pdf]

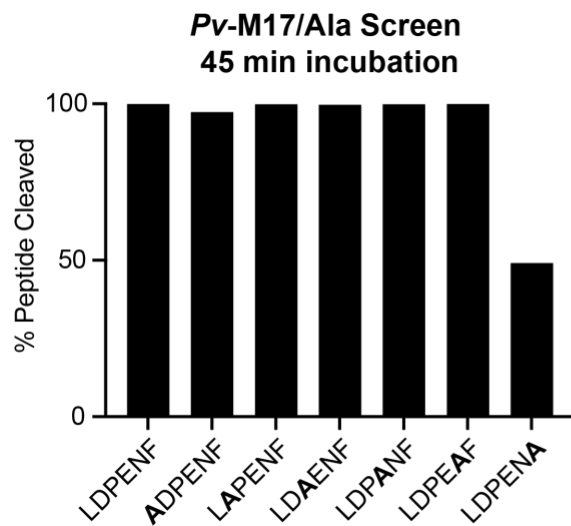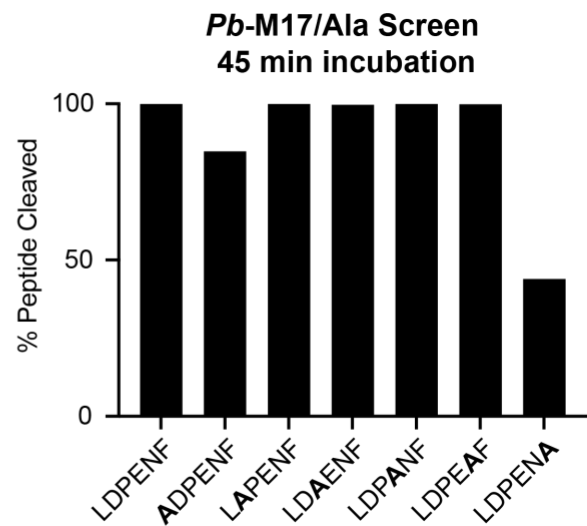

**Supplementary Figure S3. Digestion of Ala screen peptides by *Pv*-M17 and *Pb*-M17 in 45-min incubation period.** Template hexapeptide (LDPENF) and Ala screen peptides were digested to almost 100% in the 45-min incubation period at 37°C. *Pv*-M17 and *Pb*-M17 showed decreased activity levels against peptides ADPENF and LDPENA
